# Supplementary material for: Comparative genomic analysis uncovers 3 novel loci encoding type six secretion systems differentially distributed in Salmonella serotypes
Source: PubMed Central journal article supplement (PMC2907695; doi:10.1186/1471-2164-10-354), 2009-08-04

SPI-6 T6SS *S. Typhimurium* LT2

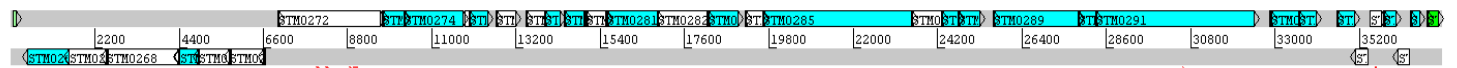

SPI-19 *S. Gallinarum* 287/91

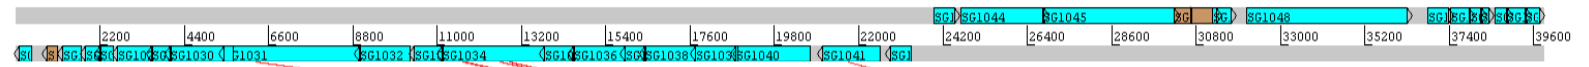

SPI-20 *S. Illa* 62:z4,z23:- RKS2980

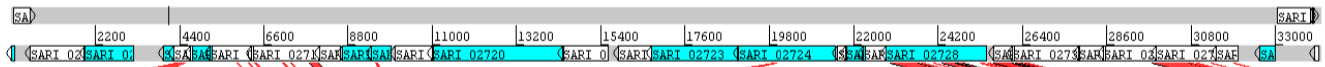

SPI-21 *S. Illa* 62:z4,z23:- RKS2980

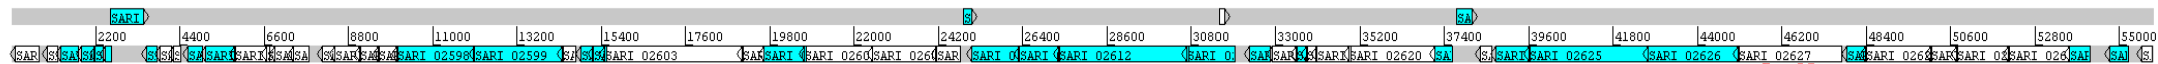

Supplement: 1471-2164-10-354-S7.pdf [file 1471-2164-10-354-S7.pdf]
